# Supplementary material for: A Novel Effect of MARCKS Phosphorylation by Activated PKC: The Dephosphorylation of Its Serine 25 in Chick Neuroblasts
Source: PLOS journal article supplement (doi:10.1371/journal.pone.0062863), 2013-04-25
Supplement: S4 (10.1371/journal.pone.0062863.s004) [file journal.pone.0062863.s004]

**Supplementary Table 1.** Assessment of cell death/suffering signs after a prolonged treatment of E4 peripheral retina cell cultures with the Cdk inhibitor roscovitine.

|                              | <b>Percent of cells with<br/>pyknotic nuclei</b> | <b>Percent of cells with<br/>surface blebbing</b> |
|------------------------------|--------------------------------------------------|---------------------------------------------------|
| <b>DMSO, 5h</b>              | 12.4 ± 1.5                                       | 7.2 ± 0.8                                         |
| <b>25 µM Roscovitine, 5h</b> | 14.2 ± 0.6                                       | 6.4 ± 0.7                                         |

Mean ± SE, N=3 different cultures, counting 1000-2000 cells/culture. Nuclei were stained with Hoechst 33342, and cell surface with anti-total MARCKS antibody ("MCl").
